# Supplementary material for: Immune Landscape and an RBM38-Associated Immune Prognostic Model with Laboratory Verification in Malignant Melanoma
Source: MDPI journal article supplement (doi:10.3390/cancers14061590), 2022-03-21
Supplement: s1 [file s1]

Supplementary Material

# Immune Landscape and an RBM38-Associated Immune Prognostic Model with Laboratory Verification in Malignant Melanoma

Jinfang Liu, Jun Xu, Binlin Luo, Jian Tang, Zuoqiong Hou, Zhechen Zhu, Lingjun Zhu, Gang Yao and Chujun Li

## 1. Supplementary Tables

**Table S1.** NBM38 shRNA sequences.

| Group | 5'-3' sequence                |
|-------|-------------------------------|
| Sh1   | CGCCATGCACGGCTCGCAGAAGGACACCA |
| Sh2   | GGCACCCTTTCGTGCAGTACCAGGCGCC  |

**Table S2.** Main reagents and consumable used in this article.

| Reagents            | Vendor                | Catalogue Number | Information                                                                          |
|---------------------|-----------------------|------------------|--------------------------------------------------------------------------------------|
| Antibody-RBM38      | BIOSS                 | bs-7682R         | Huaman, Polyclonal, IHC (1:100)                                                      |
| Antibody-CD11b      | ProteinTech           | 66519-1-lg       | Human, Monoclonal, IHC (1:100)                                                       |
| Antibody-CD19       | ProteinTech           | 66298-1-lg       | Huaman, Monoclonal, IHC (1:100)                                                      |
| Antibody-E-cadherin | ProteinTech           | 60335-1-lg       | Huaman, Monoclonal, IHC (1:100)                                                      |
| Primer-Actin        | Tsingke Biotechnology | /                | Forward:<br>5'-AGAAAATCTGGCACCACACC-3'<br>Reverse:<br>5'-TAGCACAGCCTGGATAGCAA-3'     |
| Primer-RBM38        | Tsingke Biotechnology | /                | Forward:<br>5'-ACGCCTCGCTCAGGAAGTA-3'<br>Reverse:<br>5'-GTCTTTGCAAGCCCTCTCAG-3'      |
| Primer-A2M          | Tsingke Biotechnology | /                | Forward:<br>5'-CGGAGAATGACGTACTCCACT-3'<br>Reverse:<br>5'-TGGGTTGGTCCTTTCACCTTGG-3'  |
| Primer-EBI3         | Tsingke Biotechnology | /                | Forward:<br>5'-TCATTGCCACGTACAGGCTC-3'<br>Reverse:<br>5'-GGGTCGGGCTTGATGATGTG-3'     |
| Primer-ERAP1        | Tsingke Biotechnology | /                | Forward:<br>5'-AGAGCACTGAAGCATCTCCAA-3'<br>Reverse:<br>5'-AACTGGGATGACGTACTCAGG-3'   |
| Primer-NAMPT        | Tsingke Biotechnology | /                | Forward:<br>5'-ATCCTGTTCCAGGCTATTCTGT-3'<br>Reverse:<br>5'-CCCCATATTTTCTCACACGCAT-3' |

|            |                       |   |                              |
|------------|-----------------------|---|------------------------------|
| Primer-LIF | Tsingke Biotechnology | / | Forward:                     |
|            |                       |   | 5'- CCAACGTGACGGACTTCCC -3'  |
|            |                       |   | Reverse:                     |
|            |                       |   | 5'- TACACGACTATGCGGTACAGC -3 |

**Abbreviations:** RBM38: RNA-binding protein 1; A2M: Alpha-2-macroglobulin; EBI3: Epstein-Barr virus-induced gene3; ERAP1: Endoplasmic reticulum aminopeptidase1; NAMPT: human skin fibroblasts; LIF: leukemia inhibitory factor.

**Table S3.** Clinical information of malignant melanoma patients in TCGA-SKCM dataset.

| Variables  | Group      | Alive<br>(n = 252) | Dead<br>(n = 208) | Total<br>(n = 460) |
|------------|------------|--------------------|-------------------|--------------------|
| Age        | ≤60        | 134 (53.2%)        | 115 (55.3%)       | 249 (54.1%)        |
|            | >60        | 118 (46.8%)        | 93 (44.7%)        | 211 (45.9%)        |
| Gender     | Female     | 107 (42.5%)        | 68 (32.7%)        | 175 (38.0%)        |
|            | Male       | 145 (57.5%)        | 140 (67.3%)       | 285 (62.0%)        |
| Stage      | <stage III | 130 (51.6%)        | 102 (49.0%)       | 232 (50.4%)        |
|            | ≥stage III | 122 (48.4%)        | 106 (51.0%)       | 228 (49.6%)        |
| Clinical_T | unknow     | 12 (4.8%)          | 15 (7.2%)         | 27 (5.9%)          |
|            | TX         | 24 (9.5%)          | 20 (9.6%)         | 44 (9.6%)          |
|            | <T3        | 84 (33.3%)         | 64 (30.8%)        | 148 (32.2%)        |
|            | ≥T3        | 132 (52.4%)        | 109 (52.4%)       | 241 (52.4%)        |
| Clinical_N | unknow     | 10 (4.0%)          | 9 (4.3%)          | 19 (4.1%)          |
|            | NX         | 21 (8.3%)          | 14 (6.7%)         | 35 (7.6%)          |
|            | N0         | 124 (49.2%)        | 105 (50.5%)       | 229 (49.8%)        |
|            | ≥N1        | 97 (38.5%)         | 80 (38.5%)        | 177 (38.5%)        |
| Clinical_M | unknow     | 15 (6.0%)          | 11 (5.3%)         | 26 (5.7%)          |
|            | M0         | 223 (88.5%)        | 188 (90.4%)       | 411 (89.3%)        |
|            | M1         | 14 (5.6%)          | 9 (4.3%)          | 23 (5.0%)          |

**Abbreviations:** Clinical\_T, Clinical Tumor; TX, T stage unknown; T3, Tumor thickness: 2.01 mm-4.0 mm; NX, T stage unknown; N0, metastatic lymph node presents; N1, 1 metastatic lymph node presents, lymph node size ≤3cm; M0, without distant metastasis; M1, with distant metastasis.

**Table S4.** Clinical information of malignant melanoma patients in GSE65904 dataset.

| Variables  | Group        | Alive<br>(n = 108) | Dead<br>(n = 102) | Total<br>(n = 210) |
|------------|--------------|--------------------|-------------------|--------------------|
| Age        | unknow       | 1 (0.9%)           | 0 (0%)            | 1 (0.5%)           |
|            | ≤60          | 40 (37.0%)         | 43 (42.2%)        | 83 (39.5%)         |
|            | >60          | 67 (62.0%)         | 59 (57.8%)        | 126 (60.0%)        |
| Gender     | Female       | 52 (48.1%)         | 34 (33.3%)        | 86 (41.0%)         |
|            | Male         | 56 (51.9%)         | 68 (66.7%)        | 124 (59.0%)        |
| Tumor Site | unknow       | 4 (3.7%)           | 3 (2.9%)          | 7 (3.3%)           |
|            | General      | 7 (6.5%)           | 16 (15.7%)        | 23 (11.0%)         |
|            | In-transit   | 5 (4.6%)           | 10 (9.8%)         | 15 (7.1%)          |
|            | Local        | 7 (6.5%)           | 4 (3.9%)          | 11 (5.2%)          |
|            | Primary      | 14 (13.0%)         | 1 (1.0%)          | 15 (7.1%)          |
|            | Regional     | 71 (65.7%)         | 68 (66.7%)        | 139 (66.2%)        |
|            | unknow       | 6 (5.6%)           | 9 (8.8%)          | 15 (7.1%)          |
| Tissue     | Cutaneous    | 18 (16.7%)         | 3 (2.9%)          | 21 (10.0%)         |
|            | Lymph node   | 67 (62.0%)         | 63 (61.8%)        | 130 (61.9%)        |
|            | Subcutaneous | 13 (12.0%)         | 20 (19.6%)        | 33 (15.7%)         |
|            | Visceral     | 4 (3.7%)           | 6 (5.9%)          | 10 (4.8%)          |
|            | Other        | 0 (0%)             | 1 (1.0%)          | 1 (0.5%)           |

**Table S5.** Information of melanoma patients in the training group.

| Id               | Futime      | Fustat |
|------------------|-------------|--------|
| TCGA-D3-A1Q1-06A | 1.380821918 | 1      |
| TCGA-EB-A5SH-06A | 4.501369863 | 0      |
| TCGA-FS-A1Z0-06A | 16.88767123 | 1      |
| TCGA-EB-A4P0-01A | 0.893150685 | 1      |
| TCGA-FR-A3YN-06A | 7.747945205 | 0      |
| TCGA-FS-A4FD-06A | 6.723287671 | 1      |
| TCGA-DA-A95Y-06A | 1.178082192 | 1      |
| TCGA-EE-A3J8-06A | 2.860273973 | 1      |
| TCGA-FS-A1ZG-06A | 0.808219178 | 1      |
| TCGA-GN-A268-06A | 5.232876712 | 1      |
| TCGA-EE-A2GC-06A | 5.619178082 | 0      |
| TCGA-EE-A2GT-06A | 3.739726027 | 0      |
| TCGA-EE-A2GJ-06A | 6.219178082 | 0      |
| TCGA-EE-A2M6-06A | 10.77260274 | 0      |
| TCGA-ER-A2NC-06A | 3.652054795 | 1      |
| TCGA-D3-A2JA-06A | 9.62739726  | 0      |
| TCGA-DA-A1HW-06A | 1.17260274  | 0      |
| TCGA-FS-A1ZJ-06A | 3.947945205 | 1      |
| TCGA-EE-A20H-06A | 14.02191781 | 1      |
| TCGA-GN-A4U9-06A | 1.843835616 | 1      |
| TCGA-D9-A4Z3-01A | 1.383561644 | 0      |
| TCGA-EE-A2MS-06A | 13.53972603 | 0      |
| TCGA-FS-A1ZD-06A | 4.460273973 | 1      |
| TCGA-DA-A1IC-06A | 5.673972603 | 1      |
| TCGA-EE-A17X-06A | 2.484931507 | 1      |
| TCGA-ER-A19D-06A | 1.049315068 | 1      |
| TCGA-D3-A1Q3-06A | 1.389041096 | 1      |

|                  |             |   |
|------------------|-------------|---|
| TCGA-D9-A6EG-06A | 1.912328767 | 1 |
| TCGA-EE-A2MF-06A | 22.39452055 | 1 |
| TCGA-EE-A3J4-06A | 10.6        | 1 |
| TCGA-EE-A2MR-06A | 11.2        | 0 |
| TCGA-EE-A2GM-06B | 6.290410959 | 0 |
| TCGA-EE-A3JI-06A | 12.73424658 | 1 |
| TCGA-FR-A8YC-06A | 2.901369863 | 1 |
| TCGA-D3-A8GP-06A | 12.70684932 | 0 |
| TCGA-YG-AA3P-06A | 1.202739726 | 0 |
| TCGA-WE-A8ZT-06A | 0.983561644 | 0 |
| TCGA-GN-A26C-01A | 2.249315068 | 1 |
| TCGA-D3-A51K-06A | 2.745205479 | 0 |
| TCGA-EE-A2GS-06A | 6.767123288 | 1 |
| TCGA-D3-A3MU-06A | 3.312328767 | 0 |
| TCGA-FS-A4FB-06A | 2.22739726  | 1 |
| TCGA-DA-A1I8-06A | 3.747945205 | 0 |
| TCGA-D3-A5GT-01A | 1.334246575 | 0 |
| TCGA-EE-A3J7-06A | 5.339726027 | 0 |
| TCGA-D9-A4Z6-06A | 1.536986301 | 1 |
| TCGA-EE-A2GB-06A | 4.939726027 | 0 |
| TCGA-FS-A4F0-06A | 6.484931507 | 0 |
| TCGA-EE-A3AC-06A | 4.301369863 | 0 |
| TCGA-FS-A1ZW-06A | 4.123287671 | 0 |
| TCGA-EB-A42Z-01A | 1.208219178 | 0 |
| TCGA-Z2-AA3S-06A | 8.082191781 | 0 |
| TCGA-D3-A3MV-06A | 3.775342466 | 0 |
| TCGA-D3-A1Q6-06A | 5.983561644 | 1 |
| TCGA-EE-A2GR-06A | 3.564383562 | 1 |
| TCGA-WE-A8K5-06A | 5.095890411 | 1 |
| TCGA-FR-A8YE-06A | 8.701369863 | 0 |
| TCGA-D3-A2J6-06A | 3.619178082 | 1 |
| TCGA-D3-A51R-06A | 5.317808219 | 0 |
| TCGA-EE-A2GE-06A | 13.41917808 | 0 |
| TCGA-DA-A3F8-06A | 1.347945205 | 0 |
| TCGA-D3-A8GS-06A | 9.764383562 | 1 |
| TCGA-EB-A5KH-06A | 1.695890411 | 1 |
| TCGA-D3-A3CF-06A | 2.043835616 | 1 |
| TCGA-EE-A3JA-06A | 4.432876712 | 1 |
| TCGA-EE-A2MK-06A | 13.21917808 | 0 |
| TCGA-FS-A1Z7-06A | 0.649315068 | 1 |
| TCGA-ER-A19T-01A | 0.739726027 | 1 |
| TCGA-FW-A3TV-06A | 1.126027397 | 0 |
| TCGA-EE-A29S-06A | 5.106849315 | 1 |
| TCGA-EE-A2M7-06A | 2.402739726 | 1 |
| TCGA-WE-A8ZR-06A | 0.750684932 | 1 |
| TCGA-BF-A5EP-01A | 0.917808219 | 0 |
| TCGA-EE-A2GI-06A | 4.060273973 | 0 |
| TCGA-D3-A5GS-06A | 1.515068493 | 0 |
| TCGA-Z2-AA3V-06A | 1.331506849 | 0 |
| TCGA-EE-A2MI-06A | 17.05479452 | 1 |
| TCGA-WE-A8ZO-06A | 5.635616438 | 0 |

---

|                  |             |   |
|------------------|-------------|---|
| TCGA-D3-A51E-06A | 14.56986301 | 0 |
| TCGA-EE-A2ME-06A | 8.605479452 | 1 |
| TCGA-EE-A181-06A | 2.810958904 | 1 |
| TCGA-D3-A2JG-06A | 9.460273973 | 1 |
| TCGA-EE-A2GU-06A | 7.901369863 | 0 |
| TCGA-D3-A2J9-06A | 1.980821918 | 1 |
| TCGA-FR-A728-01A | 1.597260274 | 0 |
| TCGA-D3-A3ML-06A | 1.156164384 | 1 |
| TCGA-EB-A6R0-01A | 1.279452055 | 0 |
| TCGA-D3-A8GR-06A | 10.80273973 | 1 |
| TCGA-DA-A1I2-06A | 13.93972603 | 0 |
| TCGA-FS-A1ZY-06A | 2.257534247 | 1 |
| TCGA-EE-A3AA-06A | 10.35890411 | 0 |
| TCGA-EE-A2GN-06A | 8.509589041 | 1 |
| TCGA-EE-A184-06A | 5.679452055 | 1 |
| TCGA-FS-A4F4-06A | 5.556164384 | 1 |
| TCGA-EB-A551-01A | 1.616438356 | 0 |
| TCGA-WE-A8ZY-06A | 1.01369863  | 0 |
| TCGA-DA-A3F3-06A | 0.873972603 | 1 |
| TCGA-EB-A44Q-06A | 1.134246575 | 0 |
| TCGA-GN-A4U7-06A | 0.868493151 | 1 |
| TCGA-D3-A1QB-06A | 7.978082192 | 0 |
| TCGA-WE-A8ZQ-06A | 4.980821918 | 0 |
| TCGA-D3-A8GM-06A | 8.928767123 | 1 |
| TCGA-ER-A2ND-06A | 1.945205479 | 1 |
| TCGA-EE-A29M-06A | 4.736986301 | 0 |
| TCGA-WE-AAA0-06A | 2.917808219 | 0 |
| TCGA-EE-A2MN-06A | 3.961643836 | 1 |
| TCGA-FS-A4F8-06A | 14.56986301 | 1 |
| TCGA-3N-A9WD-06A | 1.082191781 | 1 |
| TCGA-HR-A2OH-06A | 5.490410959 | 1 |
| TCGA-GF-A3OT-06A | 0.824657534 | 0 |
| TCGA-FS-A1ZF-06A | 1.287671233 | 1 |
| TCGA-EE-A2MT-06A | 5.934246575 | 0 |
| TCGA-ER-A19E-06A | 1.084931507 | 1 |
| TCGA-FS-A1ZU-06A | 2.21369863  | 1 |
| TCGA-EE-A2GK-06A | 4.561643836 | 0 |
| TCGA-D9-A6E9-06A | 0.824657534 | 0 |
| TCGA-DA-A3F2-06A | 1.8         | 0 |
| TCGA-EE-A29H-06A | 5.38630137  | 0 |
| TCGA-EE-A29L-06A | 0.216438356 | 1 |
| TCGA-W3-A824-06A | 19.01369863 | 0 |
| TCGA-DA-A1I5-06A | 8.98630137  | 0 |
| TCGA-EE-A2GL-06A | 6.638356164 | 0 |
| TCGA-EB-A42Y-01A | 1.205479452 | 0 |
| TCGA-EE-A17Z-06A | 0.720547945 | 1 |
| TCGA-EE-A29E-06A | 5.315068493 | 0 |
| TCGA-EB-A41B-01A | 0.797260274 | 0 |
| TCGA-EB-A431-01A | 1.556164384 | 0 |
| TCGA-D3-A2J7-06A | 8.591780822 | 1 |
| TCGA-EE-A2A0-06A | 3.901369863 | 1 |

---

---

|                  |             |   |
|------------------|-------------|---|
| TCGA-EE-A2MU-06A | 4.438356164 | 0 |
| TCGA-D9-A4Z5-01A | 0.597260274 | 0 |
| TCGA-DA-A1HY-06A | 9.808219178 | 0 |
| TCGA-EE-A2MQ-06A | 3.602739726 | 1 |
| TCGA-EE-A2MH-06A | 1.41369863  | 1 |
| TCGA-EE-A182-06A | 1.224657534 | 1 |
| TCGA-DA-A1I0-06A | 1.62739726  | 0 |
| TCGA-EE-A3AD-06A | 2.397260274 | 1 |
| TCGA-FS-A1Z4-06A | 2.339726027 | 1 |
| TCGA-DA-A1IB-06A | 1.243835616 | 0 |
| TCGA-DA-A960-01A | 2.202739726 | 0 |
| TCGA-EB-A24D-01A | 1.767123288 | 0 |
| TCGA-D3-A3MR-06A | 8.632876712 | 0 |
| TCGA-D3-A8GK-06A | 14.18356164 | 0 |
| TCGA-EE-A29D-06A | 1.164383562 | 1 |
| TCGA-EE-A2MD-06A | 3.939726027 | 1 |
| TCGA-BF-AAP2-01A | 1.109589041 | 0 |
| TCGA-EE-A17Y-06A | 2.268493151 | 1 |
| TCGA-D9-A3Z3-06A | 1.857534247 | 0 |
| TCGA-FS-A1ZZ-06A | 2.252054795 | 1 |
| TCGA-W3-AA1R-06A | 9.257534247 | 1 |
| TCGA-W3-AA1W-06A | 18.2630137  | 0 |
| TCGA-EE-A2A6-06A | 7.178082192 | 0 |
| TCGA-GN-A4U3-06A | 10.15890411 | 0 |
| TCGA-EE-A2MM-06A | 13.99178082 | 1 |
| TCGA-ER-A197-06A | 1.161643836 | 1 |
| TCGA-EE-A2M8-06A | 1.646575342 | 1 |
| TCGA-FS-A1YW-06A | 18.07671233 | 1 |
| TCGA-BF-A3DM-01A | 1.646575342 | 0 |
| TCGA-D3-A5GL-06A | 10.48219178 | 0 |
| TCGA-W3-AA21-06A | 8.753424658 | 1 |
| TCGA-EE-A3AH-06A | 11.56712329 | 1 |
| TCGA-EB-A4OY-01A | 1.624657534 | 0 |
| TCGA-ER-A2NE-06A | 1.679452055 | 1 |
| TCGA-EE-A2MG-06A | 8.6         | 1 |
| TCGA-DA-A1I1-06A | 16.27671233 | 0 |
| TCGA-ER-A3EV-06A | 3.915068493 | 1 |
| TCGA-D3-A2J8-06A | 5.457534247 | 1 |
| TCGA-D3-A2JB-06A | 14          | 1 |
| TCGA-Z2-A8RT-06A | 2.298630137 | 0 |
| TCGA-EB-A5VV-06A | 0.58630137  | 0 |
| TCGA-FR-A7UA-06A | 3.189041096 | 0 |
| TCGA-EE-A185-06A | 0.41369863  | 1 |
| TCGA-EE-A2ML-06A | 18.05479452 | 1 |
| TCGA-BF-A1PX-01A | 0.77260274  | 1 |
| TCGA-FR-A3R1-01A | 1.876712329 | 0 |
| TCGA-D3-A1QA-06A | 7.575342466 | 0 |
| TCGA-DA-A3F5-06A | 17.66027397 | 0 |
| TCGA-GF-A2C7-01A | 0.057534247 | 0 |
| TCGA-EE-A29V-06A | 2.156164384 | 1 |
| TCGA-EE-A2A2-06A | 3.068493151 | 0 |

---

---

|                  |             |   |
|------------------|-------------|---|
| TCGA-EB-A97M-01A | 1.134246575 | 0 |
| TCGA-ER-A2NG-06A | 4.082191781 | 1 |
| TCGA-EE-A29X-06A | 1.493150685 | 1 |
| TCGA-FS-A1ZM-06A | 8.438356164 | 0 |
| TCGA-D3-A3CC-06A | 7.243835616 | 0 |
| TCGA-FS-A1ZK-06A | 1.994520548 | 1 |
| TCGA-ER-A3ET-06A | 7.750684932 | 1 |
| TCGA-EB-A44P-01A | 1.030136986 | 0 |
| TCGA-DA-A1HV-06A | 4.115068493 | 0 |
| TCGA-FR-A729-06A | 18.4        | 0 |
| TCGA-BF-A5ES-01A | 1.342465753 | 0 |
| TCGA-EE-A2GO-06A | 10.56712329 | 0 |
| TCGA-EB-A6QY-01A | 1.046575342 | 0 |
| TCGA-WE-A8JZ-06A | 2.002739726 | 0 |
| TCGA-BF-A1Q0-01A | 2.276712329 | 0 |
| TCGA-FS-A1YX-06A | 4.049315068 | 1 |
| TCGA-EE-A180-06A | 7.915068493 | 1 |
| TCGA-QB-A6FS-06A | 0.602739726 | 0 |
| TCGA-D3-A2JN-06A | 5.539726027 | 1 |
| TCGA-D3-A1Q8-06A | 2.339726027 | 1 |
| TCGA-EE-A2GH-06A | 17.3369863  | 0 |
| TCGA-D3-A51F-06A | 4.643835616 | 0 |
| TCGA-ER-A199-06A | 0.764383562 | 1 |
| TCGA-D9-A6EA-06A | 2.098630137 | 0 |
| TCGA-EB-A44O-01A | 0.221917808 | 0 |
| TCGA-W3-A828-06A | 10.09041096 | 1 |
| TCGA-EE-A29A-06A | 5.279452055 | 1 |
| TCGA-EE-A2M5-06A | 1.805479452 | 1 |
| TCGA-EE-A29B-06A | 7.090410959 | 1 |
| TCGA-EE-A3J5-06A | 3.079452055 | 1 |
| TCGA-EE-A3JB-06A | 16.81643836 | 0 |
| TCGA-D3-A5GR-06A | 14.86027397 | 0 |
| TCGA-BF-A5EQ-01A | 0.884931507 | 0 |
| TCGA-D9-A6EC-06A | 5.520547945 | 0 |
| TCGA-EE-A20C-06A | 12.60547945 | 1 |
| TCGA-FS-A4F9-06A | 2.835616438 | 0 |
| TCGA-FS-A1ZT-06A | 4.430136986 | 0 |
| TCGA-FS-A4F2-06A | 4.178082192 | 1 |
| TCGA-YG-AA3N-01A | 0.838356164 | 0 |
| TCGA-EB-A5VU-01A | 0.879452055 | 1 |
| TCGA-EE-A3AF-06A | 1.150684932 | 1 |
| TCGA-BF-AAP1-01A | 1.120547945 | 0 |
| TCGA-EB-A3Y6-01A | 0.345205479 | 0 |
| TCGA-FS-A4F5-06A | 2.394520548 | 1 |
| TCGA-D3-A1Q9-06A | 2.632876712 | 1 |
| TCGA-D3-A51T-06A | 2.24109589  | 0 |
| TCGA-EE-A2A5-06A | 3.273972603 | 1 |
| TCGA-FS-A1ZH-06A | 2.728767123 | 1 |
| TCGA-D3-A2JP-06A | 4.964383562 | 0 |
| TCGA-BF-A5ER-01A | 0.895890411 | 0 |
| TCGA-GF-A4EO-06A | 1.619178082 | 0 |

---

---

|                  |             |   |
|------------------|-------------|---|
| TCGA-EE-A3JH-06A | 9.131506849 | 0 |
| TCGA-EE-A29R-06A | 1.205479452 | 0 |
| TCGA-ER-A19K-01A | 1.284931507 | 1 |
| TCGA-EB-A1NK-01A | 1.679452055 | 0 |
| TCGA-ER-A3PL-06A | 2.767123288 | 0 |
| TCGA-EE-A29P-06A | 4.701369863 | 0 |
| TCGA-D3-A8GL-06A | 7.42739726  | 1 |
| TCGA-D3-A3C6-06A | 4.838356164 | 1 |
| TCGA-EB-A82C-01A | 0.046575342 | 0 |
| TCGA-D9-A3Z1-06A | 1.282191781 | 1 |
| TCGA-FS-A1YY-06A | 19.04931507 | 1 |
| TCGA-D3-A2JH-06A | 3.506849315 | 0 |
| TCGA-BF-A1PZ-01A | 2.336986301 | 0 |
| TCGA-FR-A8YD-06A | 3.021917808 | 1 |
| TCGA-FS-A1ZA-06A | 2.309589041 | 1 |
| TCGA-EE-A183-06A | 2.24109589  | 1 |
| TCGA-D9-A4Z2-01A | 0.520547945 | 1 |
| TCGA-EB-A44N-01A | 0.561643836 | 1 |
| TCGA-EB-A3Y7-01A | 0.893150685 | 1 |
| TCGA-EE-A29W-06A | 16.25205479 | 0 |
| TCGA-D3-A51J-06A | 12.09315068 | 0 |
| TCGA-D3-A51H-06A | 4.695890411 | 0 |
| TCGA-FS-A1ZP-06A | 6.22739726  | 1 |
| TCGA-EE-A2GP-06A | 1.15890411  | 1 |
| TCGA-EE-A20F-06A | 7.630136986 | 0 |
| TCGA-FR-A44A-06A | 14.51780822 | 0 |
| TCGA-BF-A3DL-01A | 2.106849315 | 0 |
| TCGA-BF-A9VF-01A | 1.205479452 | 0 |
| TCGA-D3-A8GJ-06A | 20.11506849 | 0 |
| TCGA-BF-AAOX-01A | 1.216438356 | 0 |
| TCGA-EE-A3J3-06A | 14.34794521 | 1 |
| TCGA-WE-A8K1-06A | 4.087671233 | 0 |
| TCGA-XV-AAZW-01A | 1.076712329 | 1 |
| TCGA-D3-A3CB-06A | 13.87671233 | 0 |
| TCGA-BF-A1PU-01A | 1.060273973 | 0 |
| TCGA-EB-A3XE-01A | 0.493150685 | 0 |
| TCGA-D3-A1Q7-06A | 11.10410959 | 0 |
| TCGA-BF-AAP6-01A | 0.890410959 | 0 |
| TCGA-EE-A29Q-06A | 5.561643836 | 1 |
| TCGA-GN-A263-01A | 1.279452055 | 1 |
| TCGA-D3-A8GI-06A | 4.876712329 | 1 |
| TCGA-XV-AAZV-01A | 1.128767123 | 0 |
| TCGA-FS-A1ZS-06A | 12.4        | 0 |
| TCGA-D3-A3BZ-06A | 10.89315068 | 0 |
| TCGA-ER-A2NH-06A | 3.463013699 | 0 |
| TCGA-EB-A5UM-01A | 1.134246575 | 0 |
| TCGA-FR-A2OS-01A | 1.008219178 | 1 |
| TCGA-BF-A3DN-01A | 1.964383562 | 0 |
| TCGA-D3-A5GN-06A | 11.31232877 | 0 |
| TCGA-GN-A26A-06A | 2.706849315 | 1 |
| TCGA-EB-A6QZ-01A | 0.964383562 | 1 |

---



|                  |             |   |
|------------------|-------------|---|
| TCGA-D9-A3Z4-01A | 1.421917808 | 1 |
| TCGA-DA-A1I4-06A | 2.994520548 | 1 |
| TCGA-EB-A85J-01A | 0.98630137  | 0 |
| TCGA-WE-AAA3-06A | 1.643835616 | 0 |
| TCGA-EB-A3XF-01A | 0.761643836 | 0 |
| TCGA-D3-A5GU-06A | 10.43287671 | 0 |
| TCGA-D3-A8GD-06A | 1.967123288 | 0 |
| TCGA-FR-A7U9-06A | 1.564383562 | 0 |
| TCGA-DA-A1I7-06A | 5.139726027 | 0 |
| TCGA-EE-A2GD-06A | 28.34520548 | 1 |
| TCGA-W3-A825-06A | 5.252054795 | 1 |
| TCGA-ER-A2NF-01A | 2.402739726 | 1 |
| TCGA-DA-A1IA-06A | 5.493150685 | 1 |
| TCGA-BF-AAP4-01A | 0.917808219 | 0 |
| TCGA-DA-A95X-06A | 4.145205479 | 0 |
| TCGA-FS-A1ZN-01A | 2           | 1 |
| TCGA-EB-A85I-01A | 0.991780822 | 0 |
| TCGA-GN-A267-06A | 5.369863014 | 1 |
| TCGA-D3-A2JC-06A | 7.230136986 | 0 |
| TCGA-ER-A19M-06A | 5.087671233 | 1 |
| TCGA-ER-A42K-06A | 1.079452055 | 1 |
| TCGA-W3-AA1V-06B | 3.506849315 | 1 |
| TCGA-FS-A1ZB-06A | 4.071232877 | 1 |
| TCGA-EB-A4OZ-01A | 1.698630137 | 0 |
| TCGA-EB-A3XC-01A | 1.780821918 | 0 |
| TCGA-FS-A1ZE-06A | 3.871232877 | 1 |
| TCGA-D3-A3CE-06A | 5.019178082 | 1 |
| TCGA-EE-A2A1-06A | 8.575342466 | 0 |
| TCGA-D3-A1Q4-06A | 9.336986301 | 0 |
| TCGA-XV-A9W5-01A | 1.073972603 | 0 |
| TCGA-FS-A1ZR-06A | 0.950684932 | 1 |
| TCGA-EE-A2MC-06A | 5.126027397 | 1 |
| TCGA-EB-A3HV-01A | 0.106849315 | 0 |
| TCGA-FS-A4FC-06A | 4.534246575 | 1 |
| TCGA-BF-A5EO-01A | 1.926027397 | 0 |
| TCGA-IH-A3EA-01A | 1.435616438 | 0 |
| TCGA-ER-A2NB-01A | 2.347945205 | 1 |
| TCGA-EE-A3JE-06A | 4.279452055 | 0 |
| TCGA-ER-A193-06A | 2.616438356 | 1 |
| TCGA-D3-A2JD-06A | 0.989041096 | 1 |
| TCGA-ER-A196-01A | 4.890410959 | 0 |
| TCGA-EB-A82B-01A | 1.068493151 | 0 |
| TCGA-BF-A1PV-01A | 0.038356164 | 0 |
| TCGA-EE-A20B-06A | 11.15068493 | 0 |
| TCGA-XV-A9W2-01A | 1.142465753 | 0 |
| TCGA-D3-A2JF-06A | 5.17260274  | 0 |
| TCGA-EE-A2MP-06A | 20.72054795 | 0 |
| TCGA-D3-A51N-06A | 1.884931507 | 0 |
| TCGA-EE-A29C-06A | 6.580821918 | 1 |
| TCGA-BF-AAP7-01A | 0.871232877 | 0 |
| TCGA-EE-A2MJ-06A | 8.019178082 | 1 |

|                  |             |   |
|------------------|-------------|---|
| TCGA-XV-AAZY-01A | 1.109589041 | 0 |
| TCGA-D3-A2JK-06A | 1.008219178 | 1 |
| TCGA-ER-A42L-06A | 12.41917808 | 0 |
| TCGA-D3-A8GB-06A | 2.569863014 | 1 |
| TCGA-BF-A3DJ-01A | 1.271232877 | 0 |
| TCGA-D3-A8GQ-06A | 2.421917808 | 1 |
| TCGA-BF-AAP8-01A | 1.224657534 | 0 |
| TCGA-D3-A3C7-06A | 3.915068493 | 0 |
| TCGA-D3-A5GO-06A | 11.49315068 | 0 |
| TCGA-EB-A553-01A | 0.619178082 | 0 |
| TCGA-EE-A3AG-06A | 3.465753425 | 1 |
| TCGA-EB-A57M-01A | 1.093150685 | 0 |
| TCGA-EB-A299-01A | 1.035616438 | 0 |
| TCGA-BF-AAOU-01A | 1.304109589 | 0 |
| TCGA-EE-A29G-06A | 6.005479452 | 1 |
| TCGA-EE-A3AB-06A | 10.22739726 | 0 |

**Table S6.** Information of melanoma patients in the validation group.

| <b>Id</b>  | <b>Futime</b> | <b>Fustat</b> |
|------------|---------------|---------------|
| GSM1608593 | 4.695890411   | 0             |
| GSM1608594 | 0.967123288   | 1             |
| GSM1608595 | 5.82739726    | 0             |
| GSM1608596 | 3.950684932   | 0             |
| GSM1608597 | 0.180821918   | 1             |
| GSM1608598 | 7.208219178   | 0             |
| GSM1608599 | 6.649315068   | 0             |
| GSM1608600 | 3.589041096   | 0             |
| GSM1608601 | 2.238356164   | 0             |
| GSM1608602 | 3.838356164   | 1             |
| GSM1608603 | 0.276712329   | 0             |
| GSM1608604 | 8.276712329   | 1             |
| GSM1608605 | 1.761643836   | 1             |
| GSM1608606 | 3.682191781   | 1             |
| GSM1608607 | 3.016438356   | 0             |
| GSM1608608 | 0.205479452   | 0             |
| GSM1608609 | 0.210958904   | 1             |
| GSM1608610 | 4.068493151   | 1             |
| GSM1608611 | 0.254794521   | 0             |
| GSM1608612 | 2.326027397   | 1             |
| GSM1608613 | 0.468493151   | 0             |
| GSM1608614 | 0.534246575   | 1             |
| GSM1608615 | 3.468493151   | 0             |
| GSM1608616 | 17.37808219   | 0             |
| GSM1608617 | 2.246575342   | 0             |
| GSM1608619 | 0.517808219   | 0             |
| GSM1608620 | 1.24109589    | 1             |
| GSM1608621 | 3.342465753   | 0             |
| GSM1608622 | 1.531506849   | 0             |
| GSM1608623 | 2.284931507   | 1             |
| GSM1608624 | 2.821917808   | 0             |
| GSM1608625 | 8.783561644   | 0             |

---

|            |             |   |
|------------|-------------|---|
| GSM1608626 | 3.284931507 | 1 |
| GSM1608627 | 14.27945205 | 0 |
| GSM1608628 | 1.621917808 | 1 |
| GSM1608629 | 0.136986301 | 0 |
| GSM1608630 | 3.252054795 | 0 |
| GSM1608631 | 1.147945205 | 1 |
| GSM1608632 | 0.569863014 | 1 |
| GSM1608633 | 6.797260274 | 1 |
| GSM1608634 | 0.731506849 | 0 |
| GSM1608635 | 1.191780822 | 1 |
| GSM1608636 | 2.032876712 | 1 |
| GSM1608637 | 0.265753425 | 1 |
| GSM1608638 | 1.235616438 | 0 |
| GSM1608639 | 10.35342466 | 0 |
| GSM1608640 | 0.531506849 | 1 |
| GSM1608641 | 7.052054795 | 0 |
| GSM1608642 | 3.452054795 | 0 |
| GSM1608643 | 1.736986301 | 0 |
| GSM1608644 | 0.060273973 | 0 |
| GSM1608645 | 1.619178082 | 1 |
| GSM1608646 | 0.287671233 | 0 |
| GSM1608647 | 3.98630137  | 0 |
| GSM1608648 | 3.846575342 | 1 |
| GSM1608649 | 1.035616438 | 1 |
| GSM1608650 | 6.931506849 | 1 |
| GSM1608651 | 1.506849315 | 1 |
| GSM1608652 | 8.726027397 | 0 |
| GSM1608653 | 0.849315068 | 1 |
| GSM1608654 | 0.77260274  | 0 |
| GSM1608655 | 9.082191781 | 0 |
| GSM1608656 | 0.753424658 | 1 |
| GSM1608657 | 9.81369863  | 0 |
| GSM1608658 | 1.326027397 | 0 |
| GSM1608659 | 2.002739726 | 0 |
| GSM1608660 | 2.397260274 | 0 |
| GSM1608661 | 0.032876712 | 1 |
| GSM1608662 | 1.75890411  | 1 |
| GSM1608663 | 1.263013699 | 0 |
| GSM1608664 | 3.852054795 | 0 |
| GSM1608665 | 3.64109589  | 1 |
| GSM1608666 | 3.210958904 | 0 |
| GSM1608667 | 0.449315068 | 0 |
| GSM1608668 | 1           | 1 |
| GSM1608669 | 7.079452055 | 0 |
| GSM1608670 | 7.175342466 | 0 |
| GSM1608671 | 1.093150685 | 1 |
| GSM1608672 | 15.15068493 | 0 |
| GSM1608673 | 16.70410959 | 0 |
| GSM1608674 | 3.594520548 | 0 |
| GSM1608675 | 0.328767123 | 1 |
| GSM1608676 | 0.931506849 | 0 |

---

---

|            |             |   |
|------------|-------------|---|
| GSM1608677 | 1.175342466 | 1 |
| GSM1608678 | 17.67945205 | 0 |
| GSM1608679 | 3.597260274 | 0 |
| GSM1608680 | 0.764383562 | 1 |
| GSM1608681 | 3.046575342 | 0 |
| GSM1608682 | 0.304109589 | 0 |
| GSM1608683 | 0.534246575 | 1 |
| GSM1608684 | 2.010958904 | 0 |
| GSM1608685 | 1.484931507 | 1 |
| GSM1608686 | 0.224657534 | 1 |
| GSM1608687 | 0.830136986 | 1 |
| GSM1608688 | 0.249315068 | 1 |
| GSM1608689 | 0.139726027 | 0 |
| GSM1608690 | 1.246575342 | 1 |
| GSM1608691 | 0.194520548 | 0 |
| GSM1608692 | 1.161643836 | 0 |
| GSM1608693 | 1.57260274  | 1 |
| GSM1608694 | 2.81369863  | 0 |
| GSM1608695 | 15.43013699 | 0 |
| GSM1608696 | 3.915068493 | 0 |
| GSM1608697 | 0.830136986 | 1 |
| GSM1608698 | 0.912328767 | 0 |
| GSM1608699 | 0.224657534 | 1 |
| GSM1608700 | 1.350684932 | 1 |
| GSM1608701 | 0.465753425 | 0 |
| GSM1608702 | 0.980821918 | 0 |
| GSM1608703 | 6.134246575 | 0 |
| GSM1608704 | 0.345205479 | 1 |
| GSM1608705 | 6.353424658 | 0 |
| GSM1608706 | 1.936986301 | 1 |
| GSM1608707 | 3.630136986 | 1 |
| GSM1608708 | 0.375342466 | 1 |
| GSM1608709 | 3.923287671 | 1 |
| GSM1608710 | 0.016438356 | 1 |
| GSM1608711 | 0.432876712 | 0 |
| GSM1608712 | 1.057534247 | 1 |
| GSM1608713 | 1.78630137  | 0 |
| GSM1608714 | 13.71232877 | 0 |
| GSM1608715 | 0.509589041 | 0 |
| GSM1608716 | 0.243835616 | 0 |
| GSM1608717 | 1.210958904 | 1 |
| GSM1608718 | 1.780821918 | 1 |
| GSM1608719 | 0.84109589  | 0 |
| GSM1608720 | 12.19178082 | 0 |
| GSM1608721 | 0.515068493 | 1 |
| GSM1608722 | 3.347945205 | 1 |
| GSM1608723 | 3.37260274  | 0 |
| GSM1608724 | 1.706849315 | 1 |
| GSM1608725 | 0.539726027 | 1 |
| GSM1608726 | 0.871232877 | 0 |
| GSM1608727 | 1.04109589  | 1 |

---

---

|            |             |   |
|------------|-------------|---|
| GSM1608728 | 5.238356164 | 0 |
| GSM1608729 | 1.150684932 | 0 |
| GSM1608730 | 1.44109589  | 1 |
| GSM1608731 | 0.580821918 | 0 |
| GSM1608732 | 2.410958904 | 0 |
| GSM1608733 | 1.02739726  | 1 |
| GSM1608734 | 0.717808219 | 1 |
| GSM1608735 | 0.153424658 | 1 |
| GSM1608736 | 0.975342466 | 1 |
| GSM1608737 | 1.304109589 | 1 |
| GSM1608739 | 1.747945205 | 1 |
| GSM1608740 | 1.191780822 | 1 |
| GSM1608741 | 0.117808219 | 0 |
| GSM1608742 | 0.115068493 | 1 |
| GSM1608743 | 0.923287671 | 1 |
| GSM1608744 | 1.073972603 | 1 |
| GSM1608745 | 1.624657534 | 1 |
| GSM1608746 | 2.621917808 | 1 |
| GSM1608747 | 1.857534247 | 0 |
| GSM1608748 | 0.887671233 | 0 |
| GSM1608749 | 1.736986301 | 1 |
| GSM1608750 | 1.77260274  | 0 |
| GSM1608751 | 2.005479452 | 1 |
| GSM1608752 | 0.690410959 | 0 |
| GSM1608753 | 1.126027397 | 1 |
| GSM1608754 | 0.920547945 | 1 |
| GSM1608755 | 0.361643836 | 1 |
| GSM1608756 | 2.35890411  | 0 |
| GSM1608757 | 4.873972603 | 0 |
| GSM1608758 | 5.364383562 | 1 |
| GSM1608759 | 0.254794521 | 1 |
| GSM1608760 | 0.197260274 | 1 |
| GSM1608761 | 1.263013699 | 1 |
| GSM1608762 | 1.249315068 | 0 |
| GSM1608763 | 5.95890411  | 0 |
| GSM1608764 | 7.671232877 | 0 |
| GSM1608765 | 0.180821918 | 1 |
| GSM1608766 | 0.84109589  | 0 |
| GSM1608767 | 0.120547945 | 1 |
| GSM1608768 | 2.835616438 | 0 |
| GSM1608769 | 0.531506849 | 0 |
| GSM1608770 | 9.21369863  | 0 |
| GSM1608771 | 0.446575342 | 1 |
| GSM1608772 | 1.432876712 | 0 |
| GSM1608773 | 1.4         | 0 |
| GSM1608774 | 1.126027397 | 1 |
| GSM1608775 | 0.232876712 | 1 |
| GSM1608777 | 1.868493151 | 1 |
| GSM1608778 | 1.723287671 | 1 |
| GSM1608779 | 0.452054795 | 1 |
| GSM1608780 | 0.517808219 | 1 |

---

---

|            |             |   |
|------------|-------------|---|
| GSM1608781 | 0.180821918 | 0 |
| GSM1608782 | 4.052054795 | 0 |
| GSM1608783 | 0.175342466 | 1 |
| GSM1608784 | 0.476712329 | 0 |
| GSM1608785 | 3.238356164 | 1 |
| GSM1608786 | 3.432876712 | 1 |
| GSM1608787 | 1.876712329 | 0 |
| GSM1608788 | 1.345205479 | 1 |
| GSM1608789 | 2.016438356 | 1 |
| GSM1608790 | 3.005479452 | 1 |
| GSM1608791 | 2.161643836 | 0 |
| GSM1608792 | 1.421917808 | 0 |
| GSM1608793 | 4.887671233 | 0 |
| GSM1608794 | 1.550684932 | 0 |
| GSM1608795 | 3.778082192 | 0 |
| GSM1608796 | 2.331506849 | 0 |
| GSM1608798 | 0.843835616 | 0 |
| GSM1608799 | 7.917808219 | 0 |
| GSM1608800 | 1.747945205 | 1 |
| GSM1608801 | 0.808219178 | 1 |
| GSM1608802 | 0.421917808 | 1 |
| GSM1608803 | 0.531506849 | 1 |
| GSM1608804 | 0.397260274 | 1 |
| GSM1608805 | 3.271232877 | 0 |
| GSM1608806 | 4.084931507 | 0 |

---

## 2. Supplementary Figures

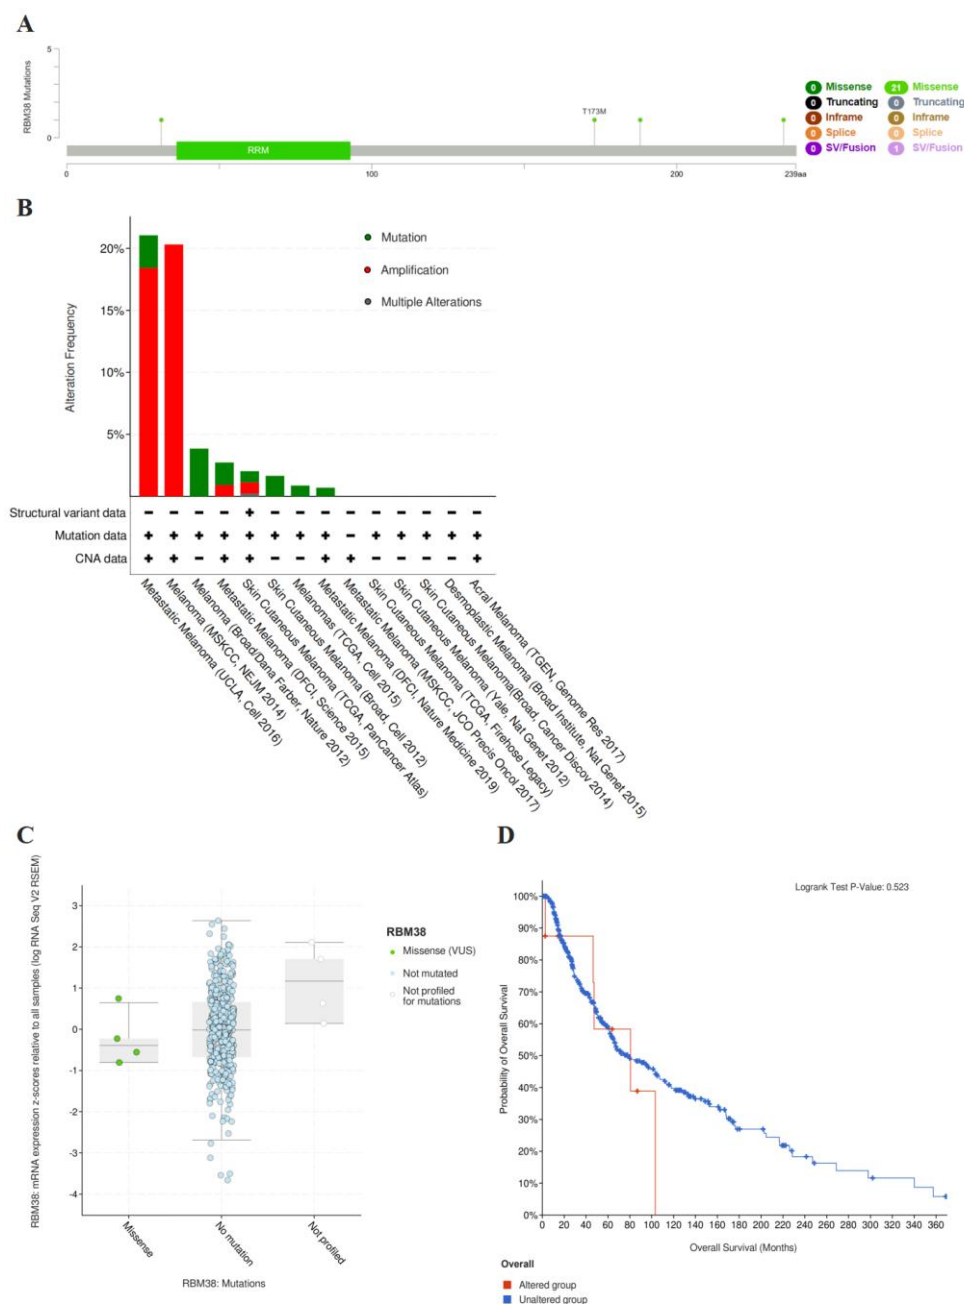

**Figure S1.** Mutation feature of RBM38 in melanoma. We analyzed the mutation features of RBM38 for melanoma using the cBioPortal tool. (A) The alteration frequency with mutation site are displayed. (B) The alteration frequency with mutation type are displayed. (C) The correlation between RBM38 and mutation types. (D) Overall survival analysis of the altered and unaltered group.

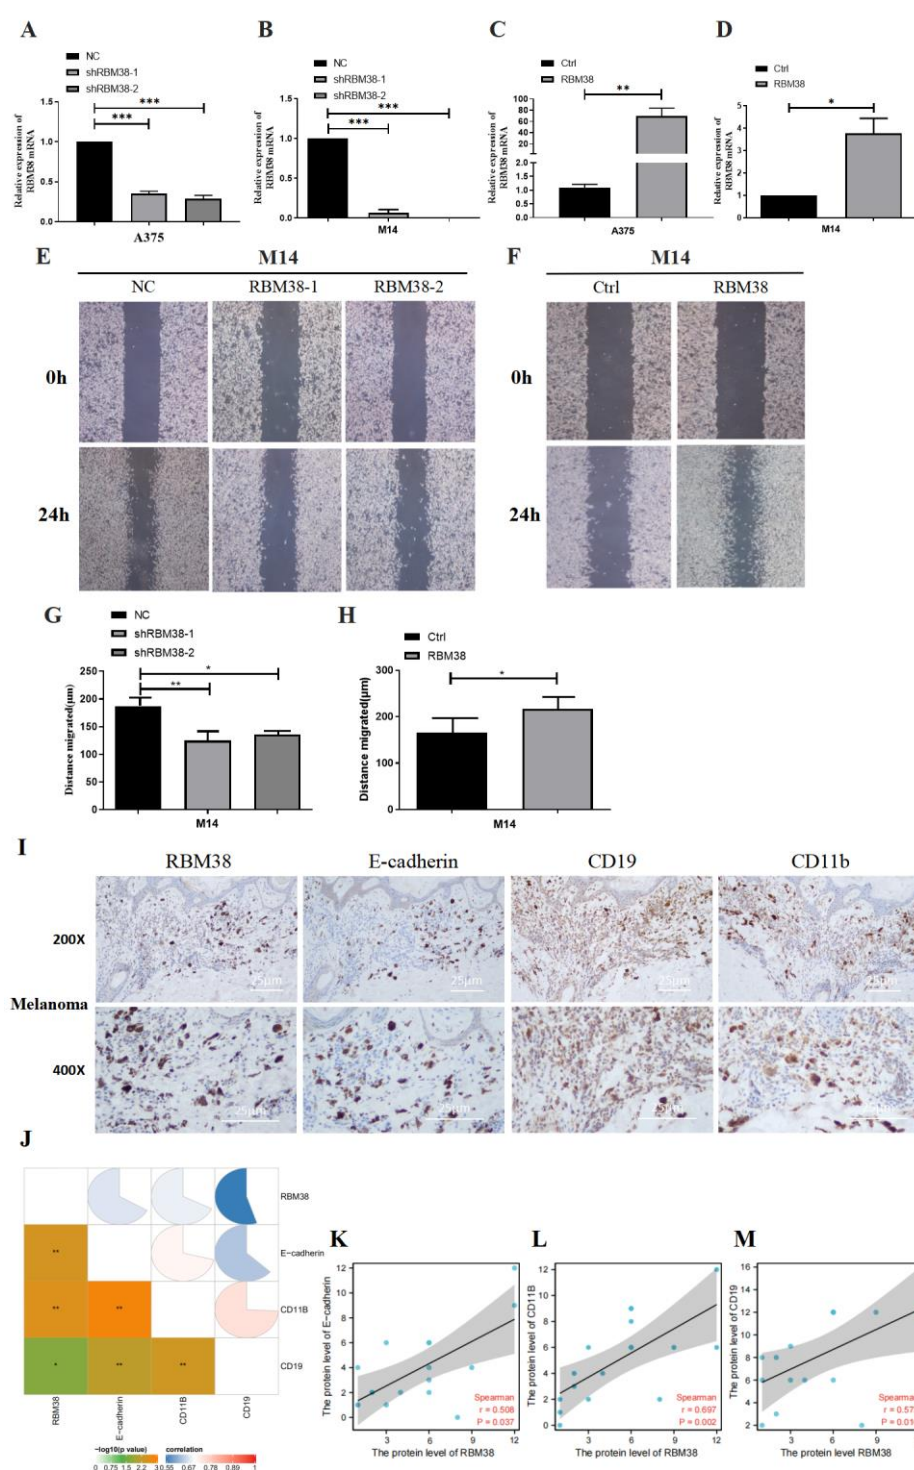

**Figure S2.** | RBM38 promoted the proliferation of malignant melanoma cells *in vitro*. (A–D) RT-qPCR analysis was used to confirm RBM38 overexpression and knockdown after transfection with lentivirus in A375 and M14 cell lines. (Data are shown as the mean  $\pm$  SD of three replicates. \* $P$  < 0.05, \*\* $P$  < 0.01, \*\*\*  $P$  < 0.001 by ANOVA test.) (E–H) Effects of RBM38 knockdown and overexpression in M14 cells by wound healing assay on cell migration. (Data are expressed as the mean  $\pm$  standard deviation of three replicates). (I) Representative images of RBM38, CD19, CD11b, and E-cadherin staining in melanoma tissues ( $n$  = 17) by IHC staining. Scale bars indicated 25  $\mu$ m. And RBM38 is correlated with CD19, CD11b, and E-cadherin. (J) The heatmap of the correlation of RBM38, CD11b, CD19, and E-cadherin of Immunohistochemical staining analysis. (\* $P$  < 0.05, \*\* $P$  < 0.01, \*\*\* $P$  < 0.001), And RBM38 is



correlated with CD19, CD11b, and E-cadherin. (K) The correlation between RBM38 and E-cadherin of Immunohistochemical staining analysis. (L) The correlation between RBM38 and CD11b of Immunohistochemical staining analysis. (M) The correlation between RBM38 and CD19 of Immunohistochemical staining analysis. (For statistical comparison between two independent experimental groups (Student's t-test) and among more than two experimental groups (ANOVA test), appropriated statistical tests were assayed. \* $P < 0.05$ , \*\* $P < 0.01$ , \*\*\* $P < 0.001$ .)

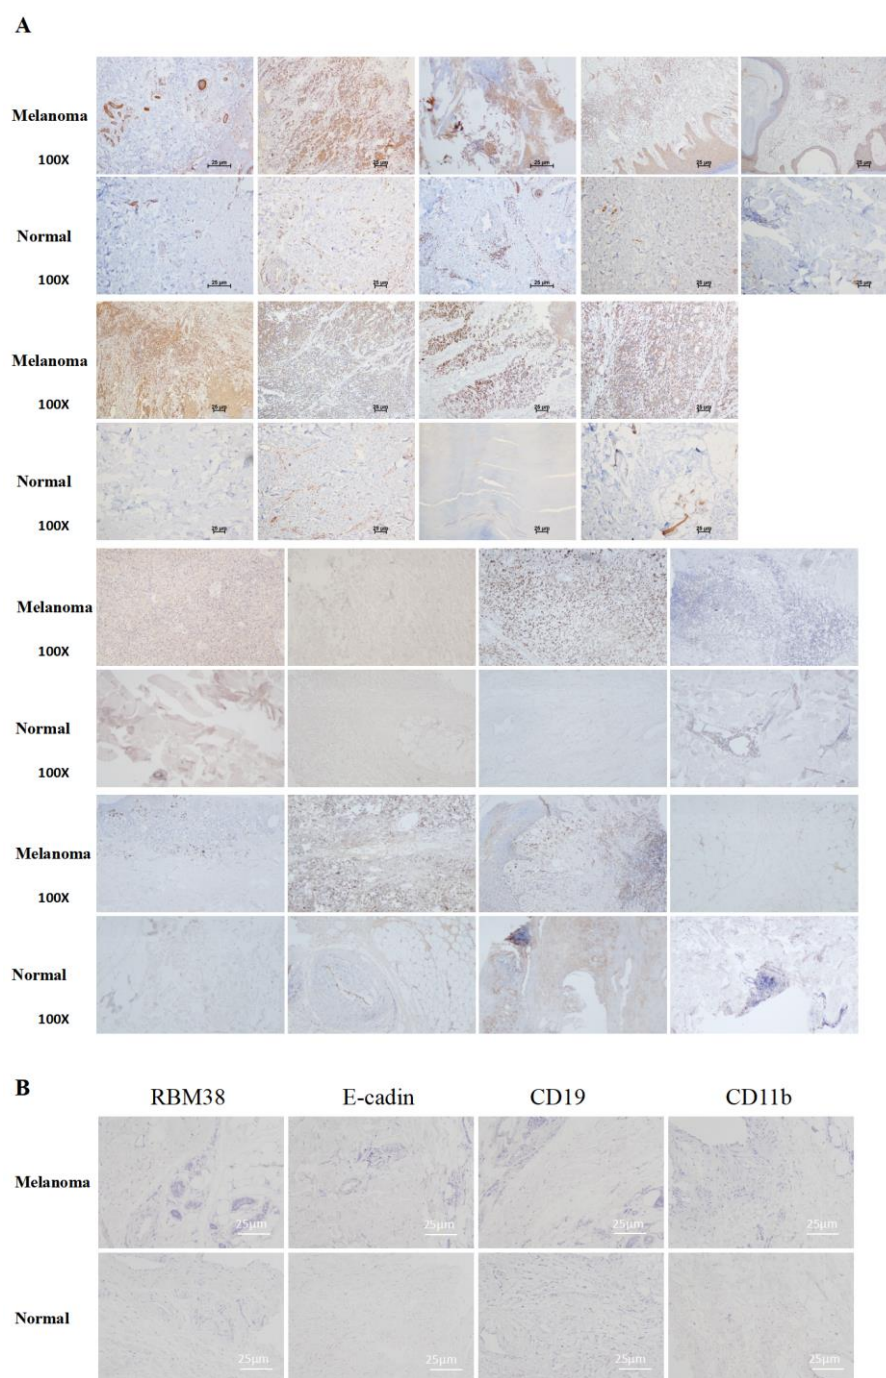

**Figure S3** Representative images of RBM38, CD19, CD11b, and E-cadherin staining. (A) Other 17 paired images of RBM38 staining in melanoma and normal tissues. (B) Representative images of negative control of tumor tissues and normal tissues staining.

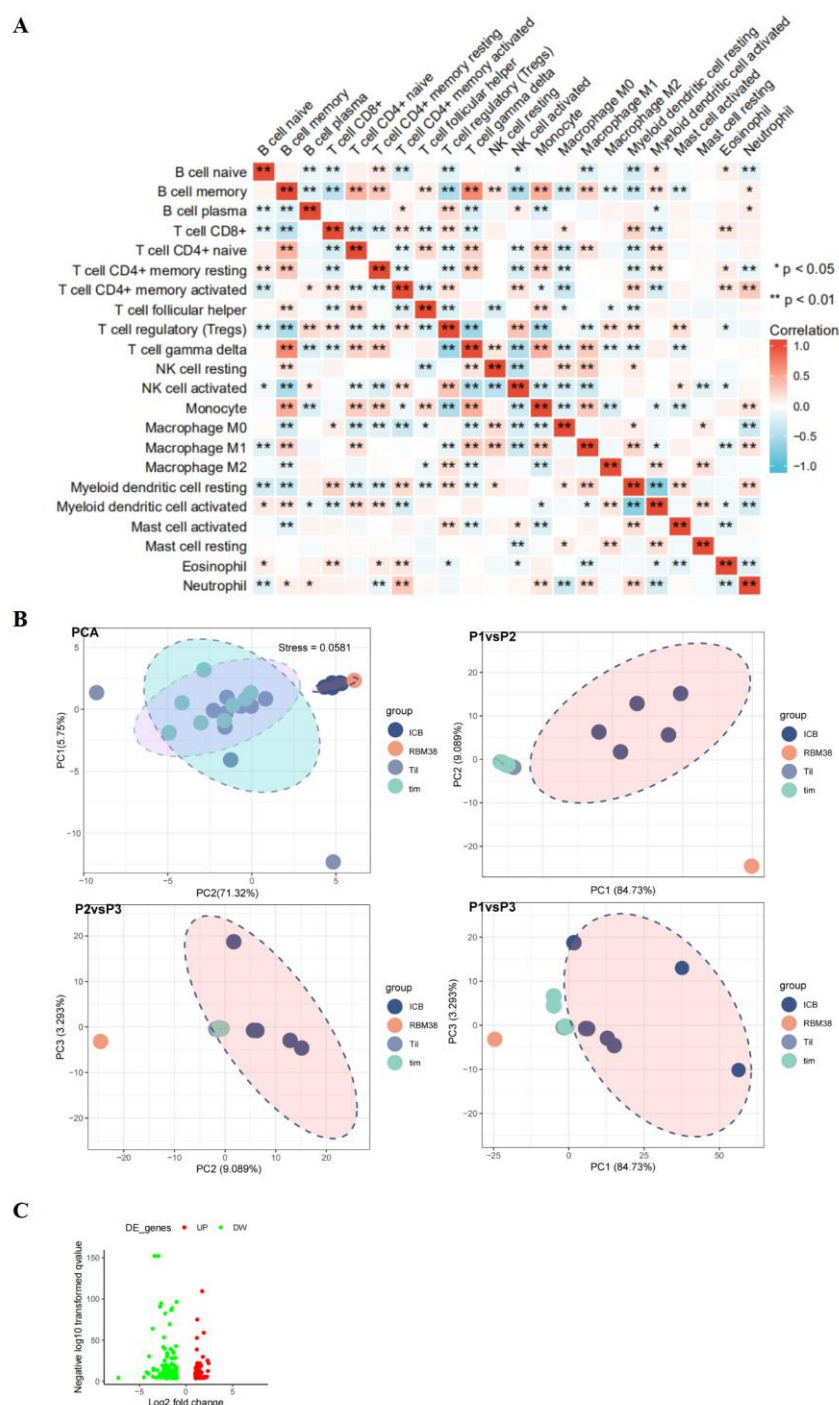

**Figure S4.** The relevance of immune cells in the TME and the correlation of TiL / TiM, ICB, and RBM38. (A) The immune cells exhibited intricate relevance among each other in the TME (\* $P < 0.05$ , \*\* $P < 0.01$ , \*\*\* $P < 0.001$ ). (B) The results showed RBM38 is correlated with ICB and not correlated with TiL and TiM through PCA analysis. (C) Total of 158 downregulated genes were differentially identified from mRNA sequencing.

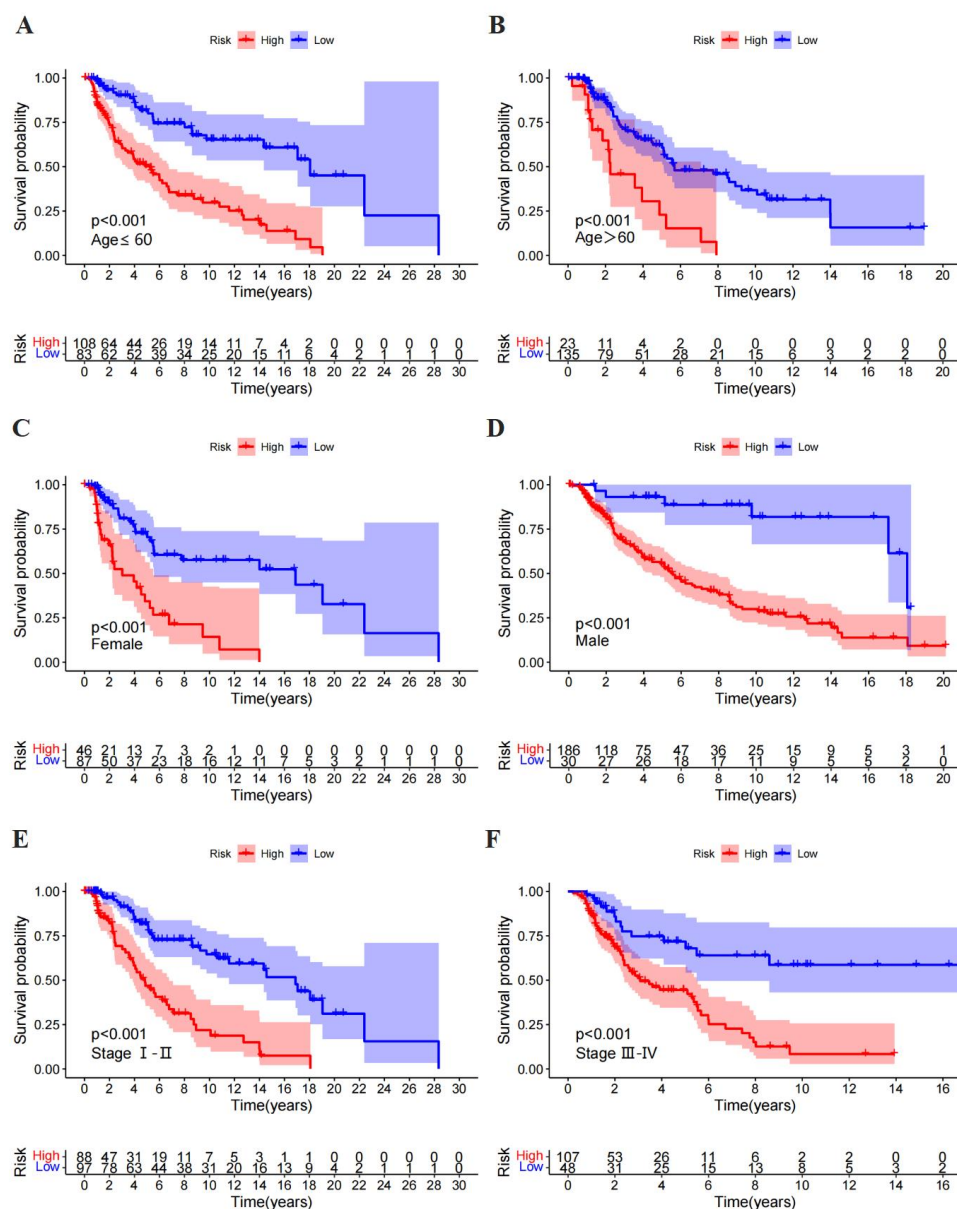

**Figure S5.** The OS of the low- and high-risk subgroups separated by clinicopathological parameters in the training group. (A-B) In the training group, the OS of the low- and high-risk subgroups separated by age were assessed. (C-D) In the training group, the OS of the low- and high-risk subgroups separated by gender were assessed. (E-F) In the training group, the OS of the low- and high-risk subgroups separated by stage were assessed.

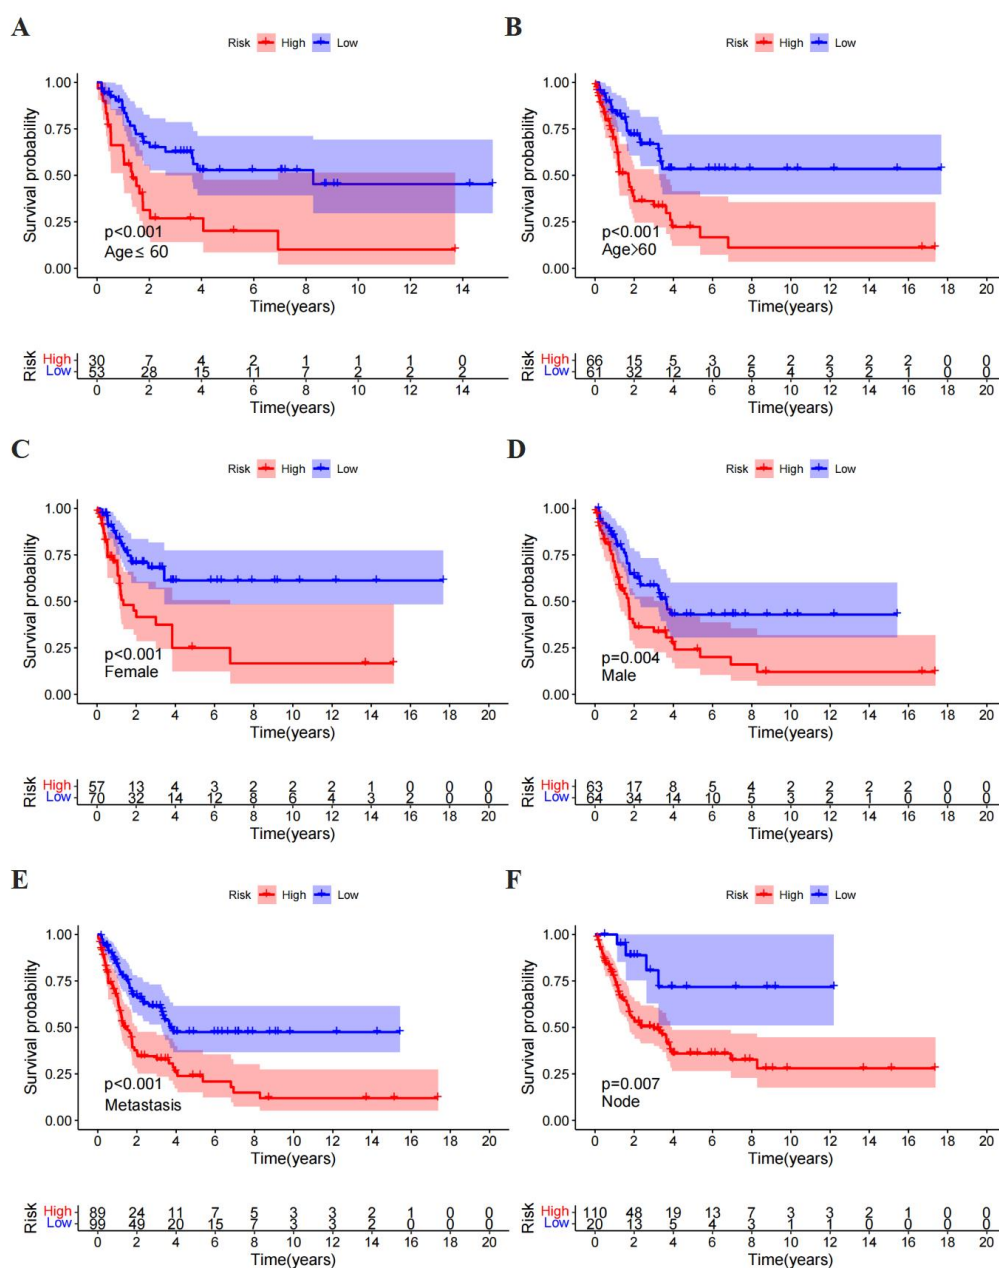

**Figure S6.** The OS of the low- and high-risk subgroups separated by clinicopathological parameters in the validation group. (A–B) In the validation group, the OS of the low- and high-risk subgroups separated by age were assessed. (C–D) In the validation group, the OS of the low- and high-risk subgroups separated by gender were assessed. (E–F) In the validation group, the OS of the low- and high-risk subgroups separated by metastasis and node were assessed.



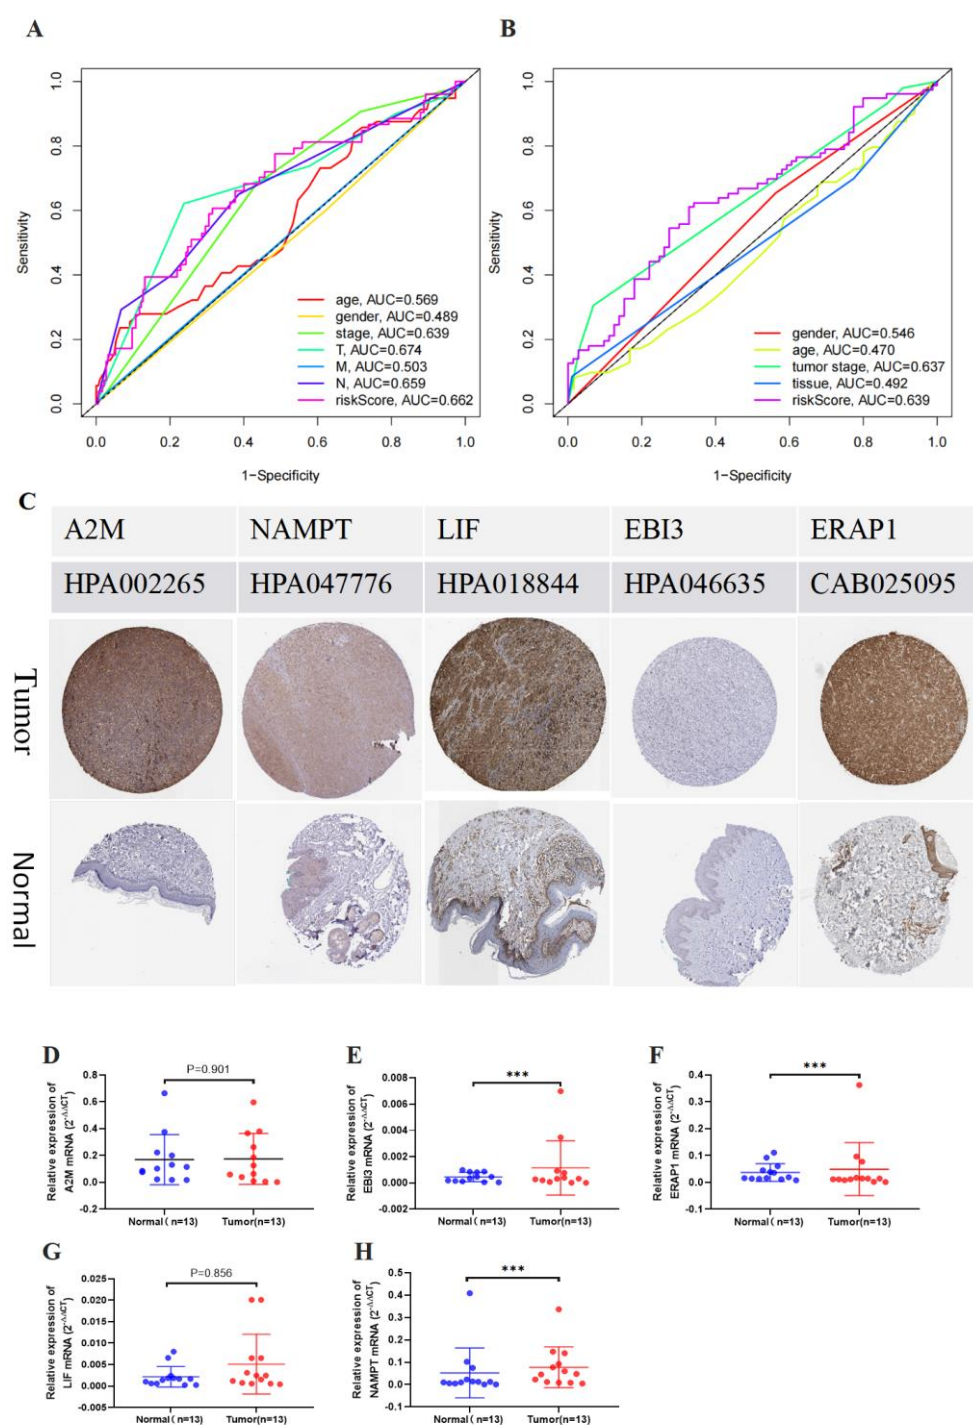

**Figure S7.** Validation of the five-gene signature and immunohistochemical assay. (A–B) In the training and validation cohort, risk score, age, gender, clinical stage, tumor, metastasis, and AUC value of nodes with clinical information were explored. (C) Protein expression of five hub genes (A2M, NAMPT, LIF, EBI3, and ERAP1) was assessed by an immunohistochemical assay in malignant melanoma, according to the Human Protein Atlas website. (D–H) RT-qPCR analysis of A2M, EBI3, NAMPT, LIF, and ERAP1 expressions of mRNA in 13 paired melanoma tissues and matched normal tissues quantified after transfection. (Data are shown as the mean  $\pm$  SD of three replicates. \* $P < 0.05$ , \*\* $P < 0.01$ , \*\*\* $P < 0.001$  by ANOVA test.)
